# Supplementary material for: Disrupted hippocampal theta-gamma coupling and spike-field coherence following experimental traumatic brain injury
Source: eLife. 2026 Jun 12;13:RP100642. doi: 10.7554/eLife.100642 (PMC13263039; doi:10.7554/eLife.100642)
Supplement: Supplementary file 1. [file elife-100642-supp1.xlsx]

## Sheet: Sheet1
NUMBER OF CELLS ACROSS ANIMALS
Animal ID	Sham/Injured	Probe	Total Cells
Animal 1	Sham	E1 (4 Shank)	0*
Animal 2	Sham	H2 (2 Shank)	16
Animal 3	Injured	E1 (4 Shank)	114
Animal 4	Injured	H2 (2 Shank)	20
Animal 5	Injured	E1 (4 Shank)	76
Animal 6	Injured	H2 (2 Shank)	18
Animal 7	Sham	E1 (4 Shank)	60
Animal 8	Sham	H2 (2 Shank)	9
Animal 9	Injured	E1 (4 Shank)	36
*Electrode drift across sessions made rigorous comparisons not possible
