# Supplementary material for: Disrupted hippocampal theta-gamma coupling and spike-field coherence following experimental traumatic brain injury
Source: eLife. 2026 Jun 12;13:RP100642. doi: 10.7554/eLife.100642 (PMC13263039; doi:10.7554/eLife.100642)
Supplement: Supplementary file 2. [file elife-100642-supp2.xlsx]

## Sheet: Sheet1
t-test Comparisons	Location	p	t	df	tail	Note
Theta Power pyr.	Fig 1 G	0.002	5.005	7	2
Gamma Power pyr.	Fig 1 G	0.007	3.803	7	2
Theta Power rad.	Fig 1 G	0.022	2.934	7	2
Gamma Power rad.	Fig 1 G	0.028	2.766	7	2
PAC pyr.	Fig 2D	0.006	3.945	7	2
PAC rad.	Fig 2D	0.623	0.514	7	2
SWR Rate - Sham	Fig 6C	0.011	5.658	3	2
SWR Rate - Injured	Fig 6C	0.052	2.735	4	2
MWM Memory Score	Fig 7A	0.02	3.295	21	2	Welch's correction
% Time Moving	Fig 1-fig supp 1A	0.096	1.751	19.17	2	Welch's correction
Mean Velocity	Fig 1-fig supp 1B	0.114	1.647	21.55	2	Welch's correction
Mean Velocity Still	Fig 1-fig supp 1C	0.234	1.22	25	2
Mean Velocity Moving	Fig 1-fig supp 1D	0.4	0.856	25	2
Theta Power pyr.	Fig 1-fig supp 2B	0.001	5.163	7	2
Gamma Power pyr.	Fig 1-fig supp 2B	0.007	3.745	7	2
Theta Power rad.	Fig 1-fig supp 2B	0.009	3.574	7	2
Gamma Power rad.	Fig 1-fig supp 2B	0.022	2.935	7	2
Theta Power pyr.	Fig 1-fig supp 3B	0.002	5.037	7	2
Gamma Power pyr.	Fig 1-fig supp 3B	0.004	4.203	7	2
Theta Power rad.	Fig 1-fig supp 3B	0.03	2.725	7	2
Gamma Power rad.	Fig 1-fig supp 3B	0.032	2.682	7	2
Theta Power pyr.	Fig 1-fig supp 4B	0.002	4.935	7	2
Gamma Power pyr.	Fig 1-fig supp 4B	0.645	0.482	7	2
Theta Power rad.	Fig 1-fig supp 4B	0.021	2.976	7	2
Gamma Power rad.	Fig 1-fig supp 4B	0.335	0.104	7	2
MWM Velocity	Fig 7-fig supp 1B	0.063	1.965	21	2
MWM Distance	Fig 7-fig supp 1B	0.098	1.733	21	2
